# Supplementary material
Source: MDPI journal article supplement (https://www.mdpi.com/2304-6732/8/9/391)

plsr mod. (Y\_Conc) from: test\_NaCl all @420-to-730

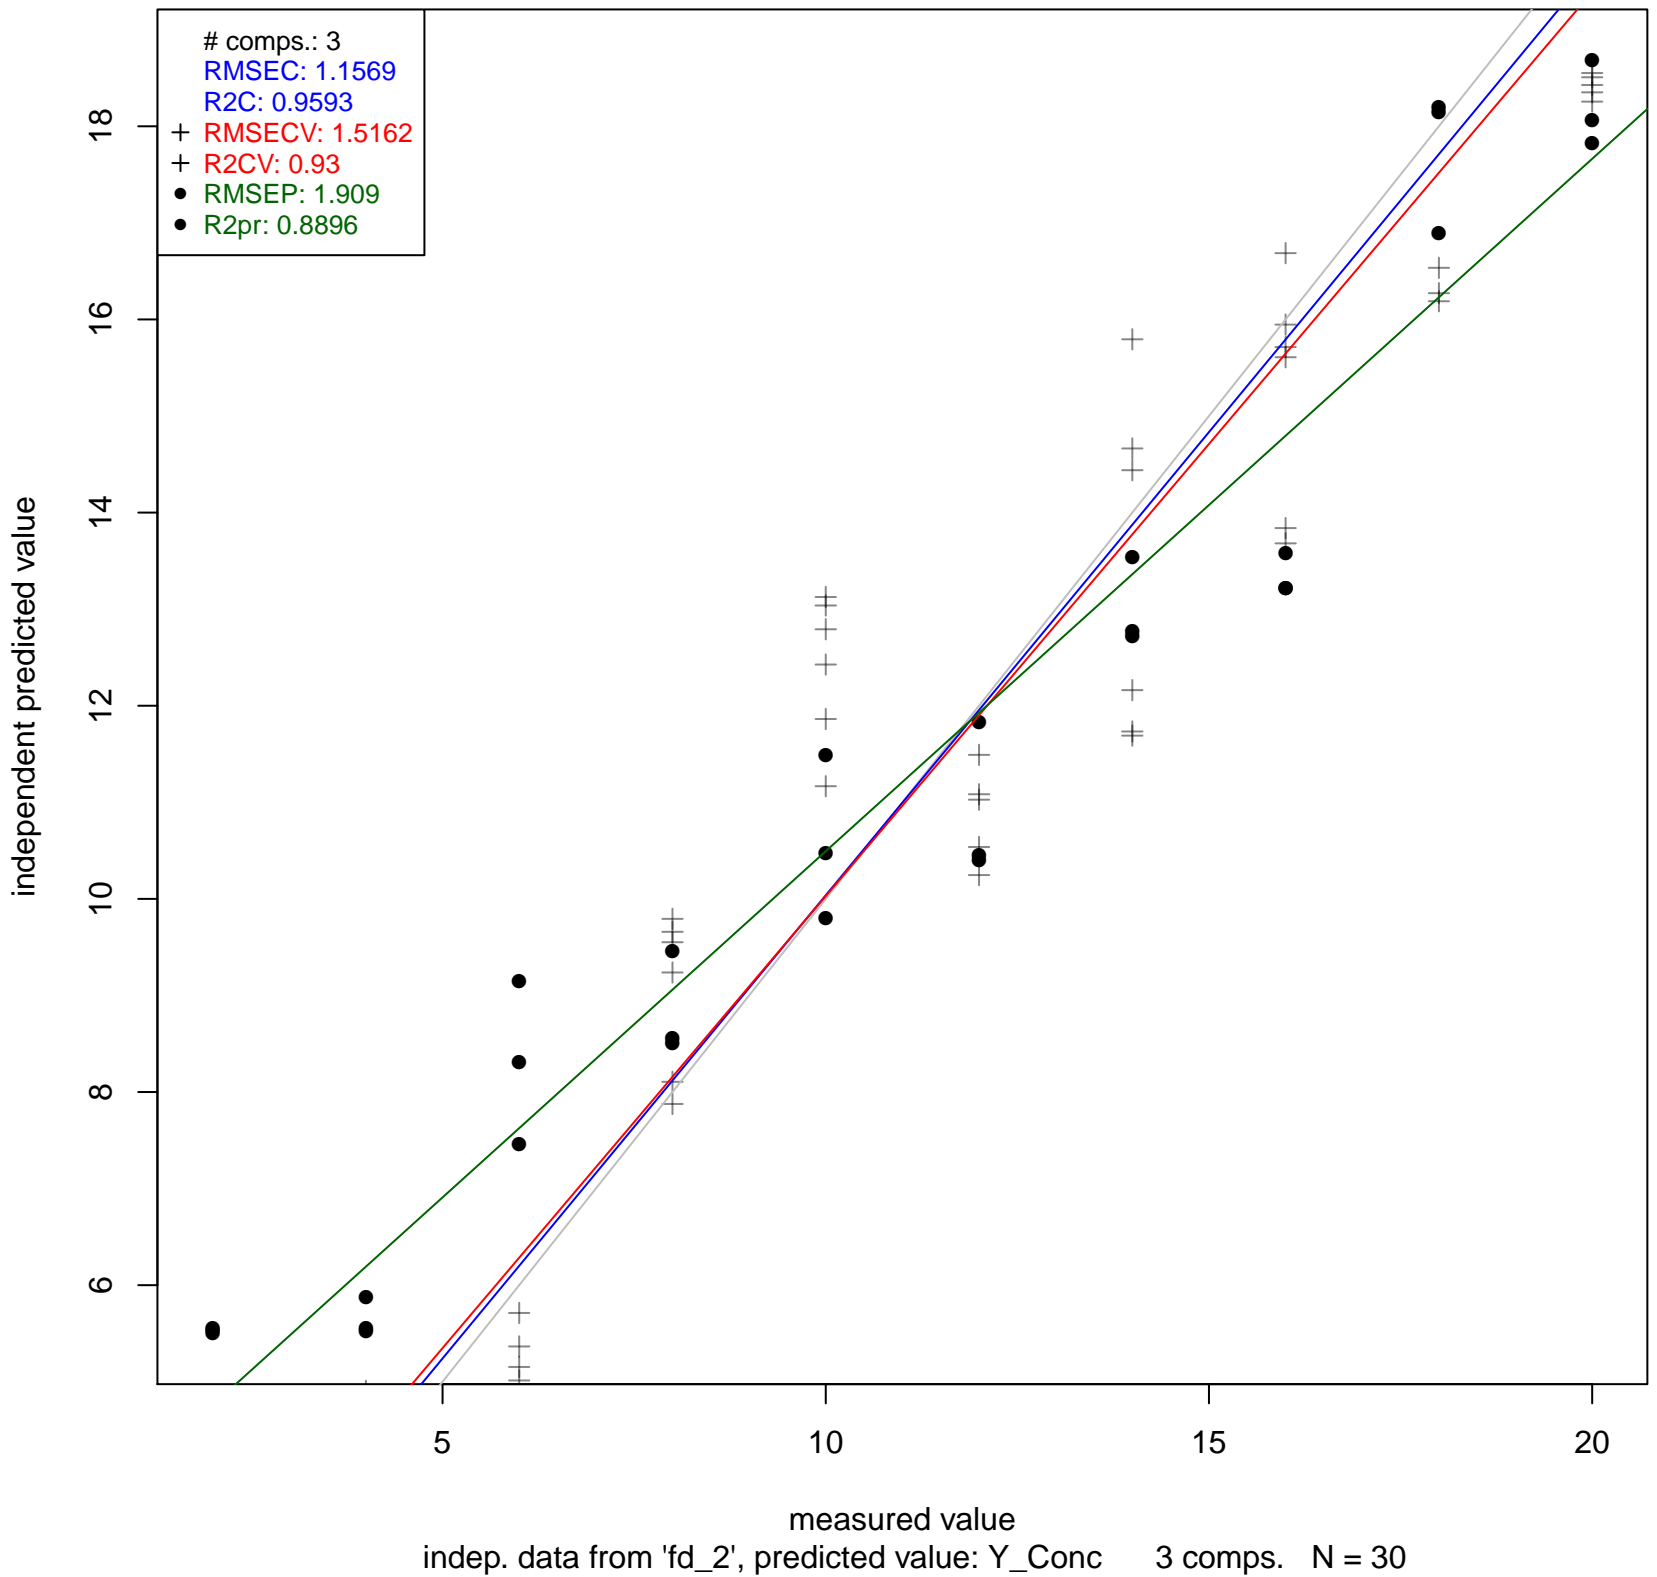

Supplement: s1 [file s1]

pls mod. (Y\_Conc) from: test\_NaCl all @420-to-730

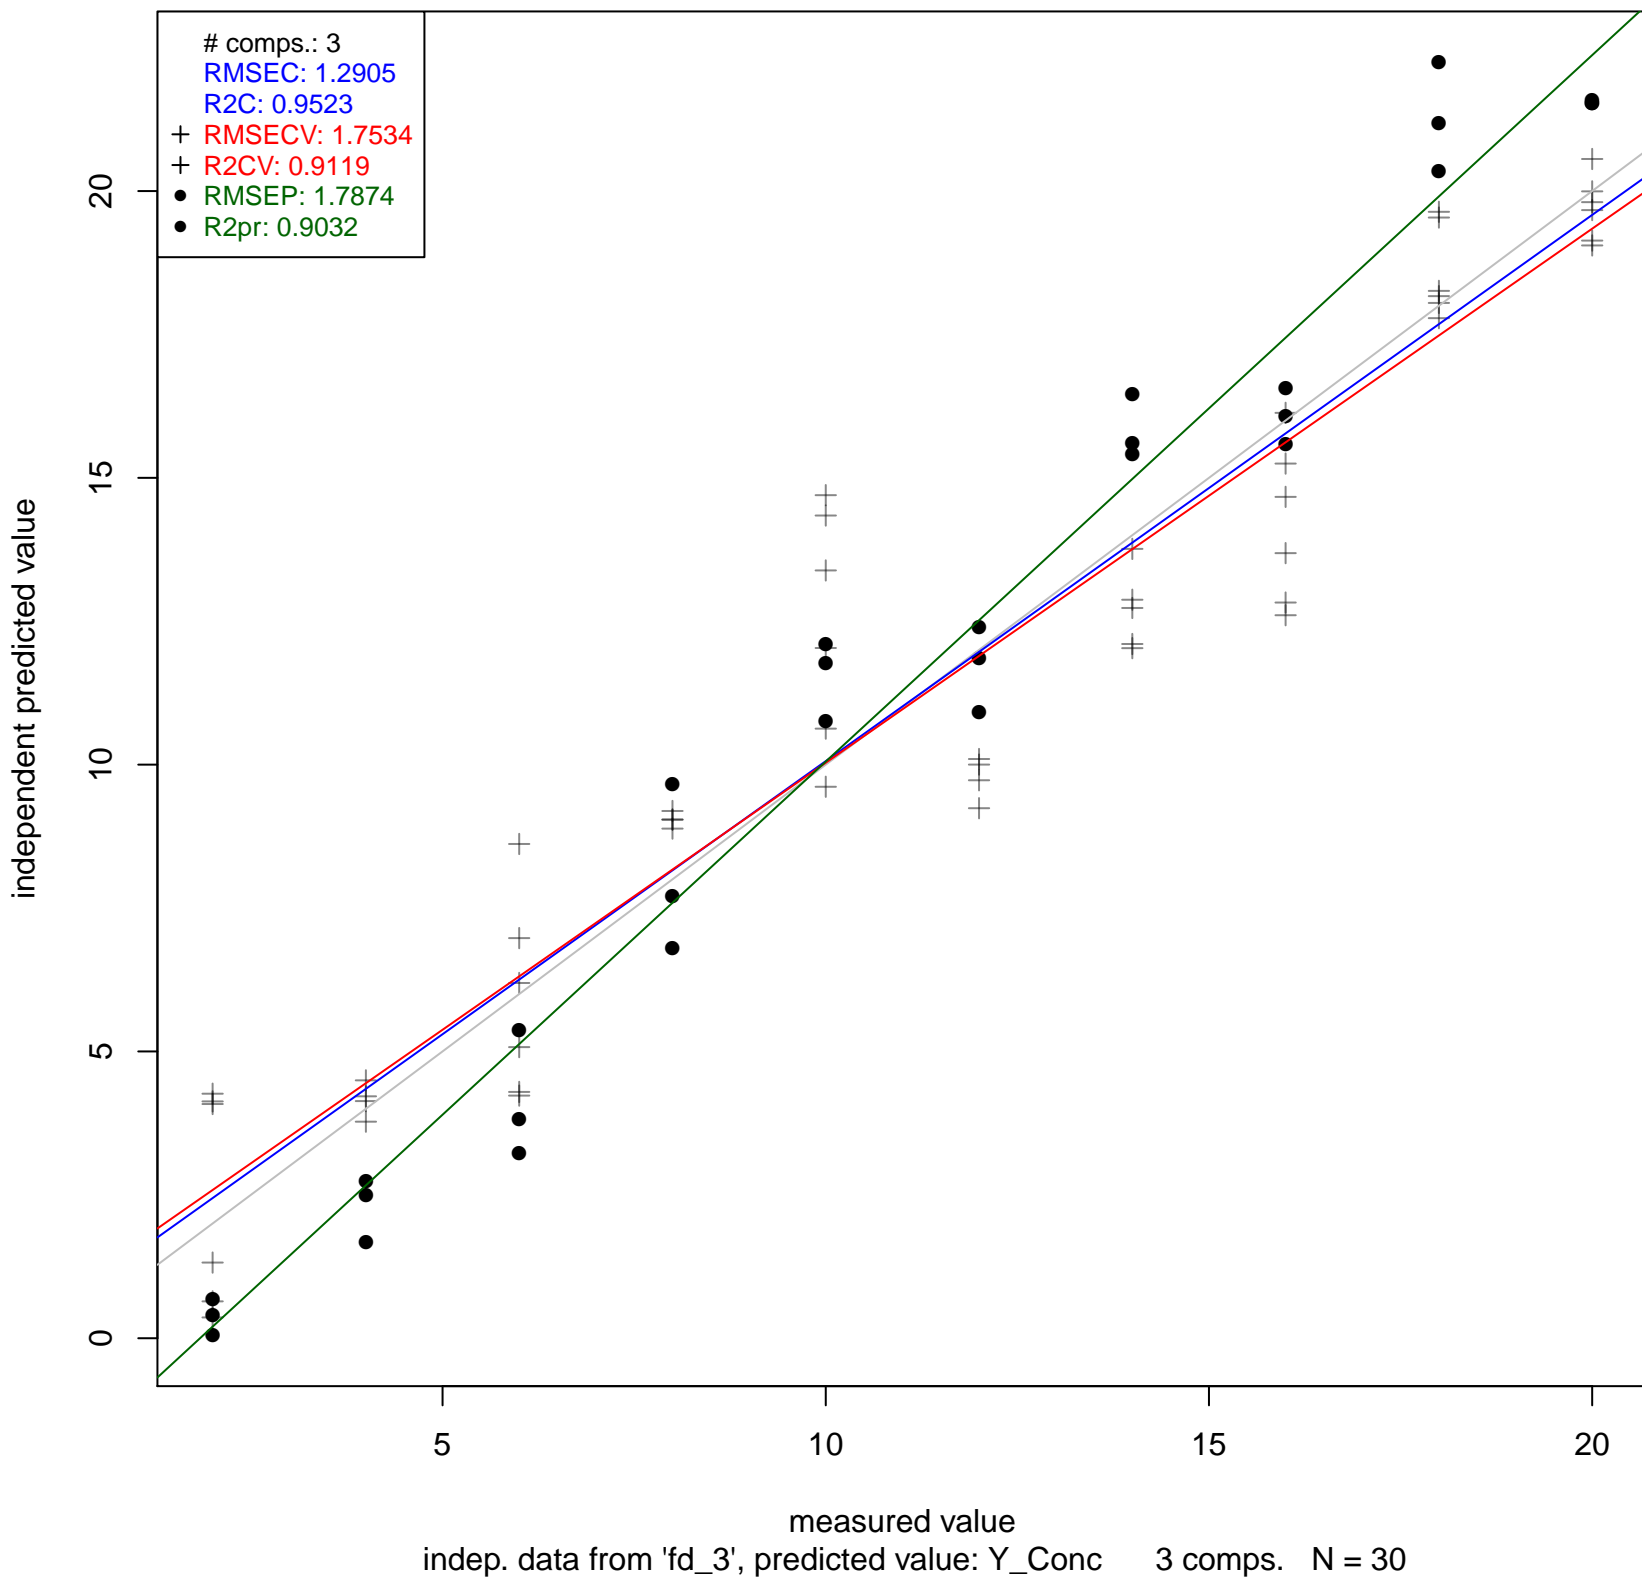

Supplement: s1 [file s1]
